# Supplementary material for: Behavioural impairment in reef fishes caused by ocean acidification at CO2 seeps
Source: Springer Nature journal article supplement (doi:10.1038/nclimate2195), 2014-04-11
Supplement: nclimate2195-s1.pdf [file nclimate2195-s1.pdf]

Browse Articles
| Nature Climate Change


Skip to main content

Thank you for visiting nature.com. You are using a browser version with limited support for CSS. To obtain
the best experience, we recommend you use a more up to date browser (or turn off compatibility mode in
Internet Explorer). In the meantime, to ensure continued support, we are displaying the site without styles
and JavaScript.

Advertisement


- View all journals
- Search
- Log in

- Explore content
- About the journal
- Publish with us

- Sign up for alerts
- RSS feed


1. nature
2. nature climate change
3. browse articles

# Browse Articles

## Filter By:

Article Type

All

- All
- Analysis (37)
- Article (644)
- Author Correction (68)
- Books & Arts (81)
- Comment (171)
- Commentary (248)
- Correction (42)
- Correspondence (194)
- Editorial (215)
- Feature (60)
- Letter (782)
- News & Views (509)
- News Feature (68)
- Perspective (205)
- Policy Watch (40)
- Publisher Correction (45)
- Research Briefing (57)
- Research Highlight (289)
- Research Highlights (642)
- Review Article (79)

Year

All

- All
- 2024 (101)
- 2023 (338)
- 2022 (307)
- 2021 (290)
- 2020 (291)
- 2019 (289)
- 2018 (338)
- 2017 (276)
- 2016 (274)
- 2015 (408)
- 2014 (382)
- 2013 (293)
- 2012 (422)
- 2011 (323)
- 2010 (69)
- 2009 (137)
- 2008 (144)
- 2007 (79)

- ### Analysing health system capacity and preparedness for climate change

  The authors perform a meta-analysis to assess current and future capacities of healthcare systems under climate change. They summarize the key focus points of current literature and highlight the need for effective policies, trained workforces and redesigned infrastructure to meet future burdens.

  - Jeffrey Braithwaite
  - Elle Leask
  - Yvonne Zurynski

  Analysis26 Apr 2024
- ### Large methane mitigation potential through prioritized closure of gas-rich coal mines

  Methane emissions from abandoned mines have been underestimated in emissions inventories even though they may become a dominant source of emissions as coal is phased out. Using a detailed bottom-up dataset, the authors find that a strategy targeting the closure of gas-rich mines could have a large mitigation potential

  - Qiang Liu
  - Fei Teng
  - Lixin Wu

  Analysis26 Apr 2024
- ### Interactions between climate change and urbanization will shape the future of biodiversity

  In this Perspective, the authors develop an integrated framework to understand and predict the joint impacts of climate change and urbanization on biodiversity and ecosystems. They review examples of interacting impacts and present opportunities for future research.

  - Mark C. Urban
  - Marina Alberti
  - Kristien I. Brans

  Perspective26 Apr 2024
- ### Extreme weather threatens informal settlements

  Residents of informal settlements suffer from extreme weather due to their precarious living environment. Now, findings show that extreme weather event thresholds do not fully capture the negative impacts experienced by women in Nairobi, Kenya.

  - Lauren Broyles

  News & Views23 Apr 2024
- ### Industrial policy, populism and the political economy of climate action

  Recent policy progress in the United States shows how populism can help advance climate goals, but at a steep cost. Avoiding setbacks will require curbing protectionist reflexes and harnessing opportunities for global cooperation.

  - David M. Driesen
  - Michael A. Mehling
  - David Popp

  Comment23 Apr 2024
- ### Extreme weather should be defined according to impacts on climate-vulnerable communities

  Defining thresholds for extreme weather events is important for adaptation but often ignores impacts on climate-vulnerable communities. This research finds current practices do not capture experiences of women in informal settlements and self-reported impact data could help to address the issue.

  - Samantha C. Winter
  - Mark R. Winter
  - Susan S. Witte

  Article23 Apr 2024
- ### Climate change will impact the value and optimal adoption of residential rooftop solar

  Climate change will affect the adoption of residential rooftop solar photovoltaics by changing the patterns of both electricity generation and demand. This research projects that climate change will increase the future value and optimal capacity of household rooftop solar across the United States.

  - Mai Shi
  - Xi Lu
  - Michael T. Craig

  Article19 Apr 2024
- ### Going beyond averages

  Global projections of the economic impacts of climate change have usually focused on rising average temperatures. Now, two studies depict more complex and gloomier scenarios by incorporating variability in temperature and precipitation.

  - Matteo Coronese

  News & Views17 Apr 2024
- ### Climate damage projections beyond annual temperature

  Existing global economic damage assessments only focus on the impacts induced by annual temperature changes. Including variability and extremes of temperature and precipitation in climate damage projections raises global gross domestic product losses and exacerbates global disparities of economic damage.

  - Paul Waidelich
  - Fulden Batibeniz
  - Sonia I. Seneviratne

  ArticleOpen Access17 Apr 2024
- ### Lessons from past mitigation efforts

  International cooperation is essential to mitigate climate change, yet it comes with challenges that often hinder countries from achieving their climate targets. Now, a study shows that timely monitoring and review of national climate mitigation efforts are essential for the Paris Agreement to accomplish its targets.

  - Nada Maamoun

  News & Views16 Apr 2024
- ### Revisiting Copenhagen climate mitigation targets

  The 15th Conference of the Parties (COP15) in Copenhagen marked an important step in global climate action with parties submitting 2020 mitigation targets. However, this retrospective study shows that many countries either have failed to meet their targets or have reduced their emissions through carbon leakage.

  - Shuping Li
  - Jing Meng
  - Dabo Guan

  ArticleOpen Access16 Apr 2024
- ### Sharks at risk from climate-driven coastal upwelling

  As climate change redirects migration patterns of marine species towards the extremes of their geographic range, sharks find themselves stunned by rising cold upwelling currents.

  - Valentina Di Santo

  News & Views15 Apr 2024
- ### Climate change-driven cooling can kill marine megafauna at their distributional limits

  The authors link intensification of cold upwelling in two western boundary currents to the observed death of marine organisms, and upwelling avoidance behaviour in bull sharks. They raise concerns of increased risk of cold-mortality events for climate migrants at their poleward distribution limits.

  - Nicolas Lubitz
  - Ryan Daly
  - Adam Barnett

  Article15 Apr 2024
- ### Frugivores enhance potential carbon recovery in fragmented landscapes

  The authors use individual-based models to assess the contribution of frugivore-mediated seed dispersal to forest restoration. They show that the movement of large birds—which disperse seeds with higher carbon storage potential—is limited in landscapes with low forest cover (<40%).

  - Carolina Bello
  - Thomas W. Crowther
  - Daisy H. Dent

  ArticleOpen Access15 Apr 2024
- ### Climate change in and out of the therapy room

  Climate change can have profound impacts on mental health, yet few therapists receive training on how to talk to their clients about this issue. This Comment explores strategies for therapists to best support clients in climate distress.

  - Noa Heiman

  Comment12 Apr 2024
- ### Western North Pacific tropical cyclone activity modulated by phytoplankton feedback under global warming

  The degree to which changes in marine organisms due to warming can influence tropical cyclones is not well known. Here the authors show that changing chlorophyll patterns can lead to more landfalling tropical cyclones in East Asia.

  - Han-Kyoung Kim
  - Jong-Yeon Park
  - Jun-Hyeok Son

  Article11 Apr 2024
- ### Ocean salinity

  - Lingxiao Yan

  Research Highlight10 Apr 2024
- ### Drive to electrify

  Policies and subsidies can help, and have helped, to establish the electric vehicle market. As subsidies are withdrawn and policies shift, the public will play a role in the future market infiltration.

  Editorial10 Apr 2024
- ### Slow wetland sink recovery

  - Samuel Royle

  Research Highlight10 Apr 2024
- ### Climate influencers on social media

  - Danyang Cheng

  Research Highlight10 Apr 2024

- Previous page
- page 1
- page 2
- page 3
- …
- page 239
- Next page

## Explore content

- Research articles
- Reviews & Analysis
- News & Comment
- Current issue
- Collections

- Follow us on Facebook
- Follow us on Twitter
- Sign up for alerts
- RSS feed


## About the journal

- Aims & Scope
- Journal Information
- Journal Metrics
- About the Editors
- Research Cross-Journal Editorial Team
- Reviews Cross-Journal Editorial Team
- Our publishing models
- Editorial Values Statement
- Editorial Policies
- Content Types
- Advisory Panel
- Contact
- Web Feeds


## Publish with us

- Submission Guidelines
- For Reviewers
- Language editing services
- Submit manuscript

## Search

Search articles by subject, keyword or author

Show results from

All journals
This journal

Search

Advanced search

### Quick links

- Explore articles by subject
- Find a job
- Guide to authors
- Editorial policies

Nature Climate Change (*Nat. Clim. Chang.*)

ISSN 1758-6798 (online)

ISSN 1758-678X (print)

## nature.com sitemap

### About Nature Portfolio

- About us
- Press releases
- Press office
- Contact us

### Discover content

- Journals A-Z
- Articles by subject
- protocols.io
- Nature Index

### Publishing policies

- Nature portfolio policies
- Open access

### Author & Researcher services

- Reprints & permissions
- Research data
- Language editing
- Scientific editing
- Nature Masterclasses
- Research Solutions

### Libraries & institutions

- Librarian service & tools
- Librarian portal
- Open research
- Recommend to library

### Advertising & partnerships

- Advertising
- Partnerships & Services
- Media kits
- Branded
  content

### Professional development

- Nature Careers
- Nature 
  Conferences

### Regional websites

- Nature Africa
- Nature China
- Nature India
- Nature Italy
- Nature Japan
- Nature Middle East

- Privacy
  Policy
- Use
  of cookies
- Your privacy choices/Manage cookies
- Legal
  notice
- Accessibility
  statement
- Terms & Conditions
- Your US state privacy rights

© 2024 Springer Nature Limited

xml version="1.0" encoding="UTF-8"?
